# Supplementary material
Source: PubMed Central journal article supplement (PMC4238381)
Supplement: NIHMS332426-supplement-01.pdf [file NIHMS332426-supplement-01.pdf]

## New Protein IDs i

| Accessions   |
|--------------|
| gi 110351016 |
| gi 157879676 |
| gi 163866859 |
| gi 165905307 |
| gi 169646833 |
| gi 171544947 |
| gi 189520149 |
| gi 189522065 |
| gi 189525232 |
| gi 192453566 |
| gi 193795858 |
| gi 197725770 |
| gi 206598064 |
| gi 209156262 |
| gi 209737272 |
| gi 21069133  |
| gi 213511754 |
| gi 213511906 |
| gi 222087959 |
| gi 223673131 |
| gi 225704094 |
| gi 225706018 |
| gi 225708050 |
| gi 225708426 |
| gi 225716680 |
| gi 229367098 |
| gi 229367226 |
| gi 229367246 |
| gi 229367256 |
| gi 229367734 |
| gi 229368010 |
| gi 229368022 |
| gi 243011    |
| gi 269973893 |
| gi 291190910 |
| gi 292611696 |
| gi 292614613 |
| gi 292620872 |
| gi 292624213 |
| gi 292624336 |
| gi 296785442 |
| gi 300810921 |
| gi 3023920   |
| gi 303227979 |
